# Supplementary material for: Changes in Liver Lipidomic Profile in G2019S-LRRK2 Mouse Model of Parkinson’s Disease
Source: MDPI journal article supplement (doi:10.3390/cells12050806), 2023-03-04
Supplement: s1 [file s1]

Supplementary information

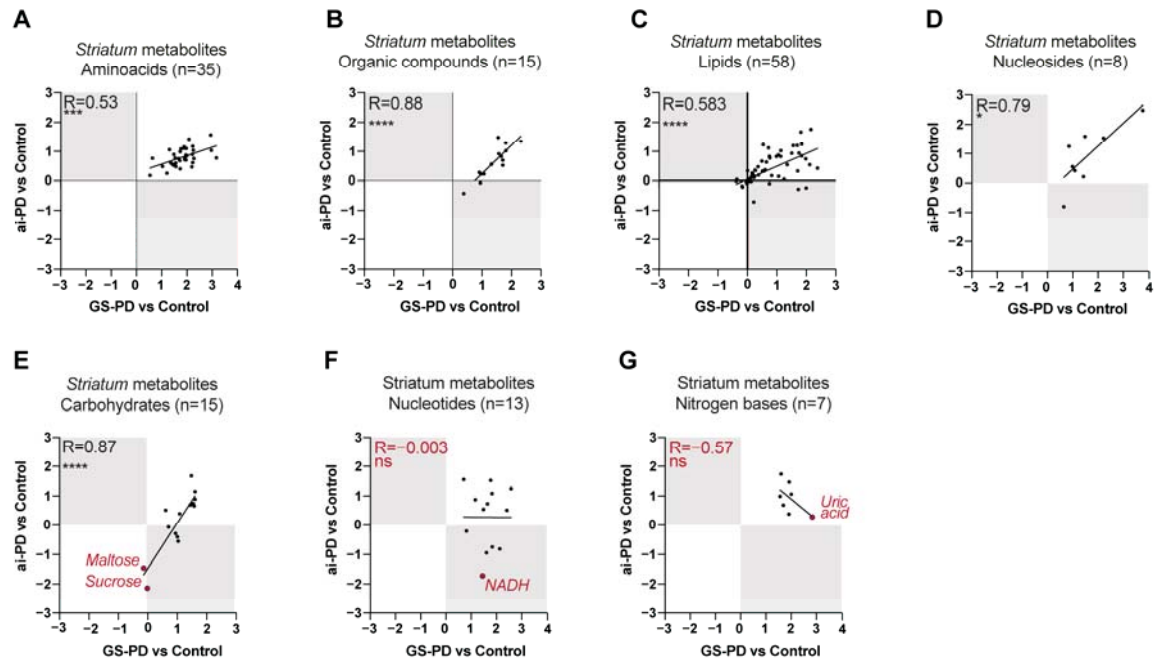

**Figure S1:** Correlation analysis between the changes observed in striatal neurons of the genetic model of PD (GS-PD) and acute intoxication (ai-PD) compared to healthy mice (Control). Striatum metabolites were analyzed by divisions into metabolic routes: amino acids (A), organic compounds (B), lipids (C), nucleosides (D), carbohydrates (E), nucleotides (F) and nitrogen bases (G). Statistical analysis was performed by obtaining p values (ns: non-significant; \*\*\* ( $p<0.001$ ), \*\*\*\* ( $p<0.0001$ )), and Pearson's correlation coefficients (R) between the observed changes.

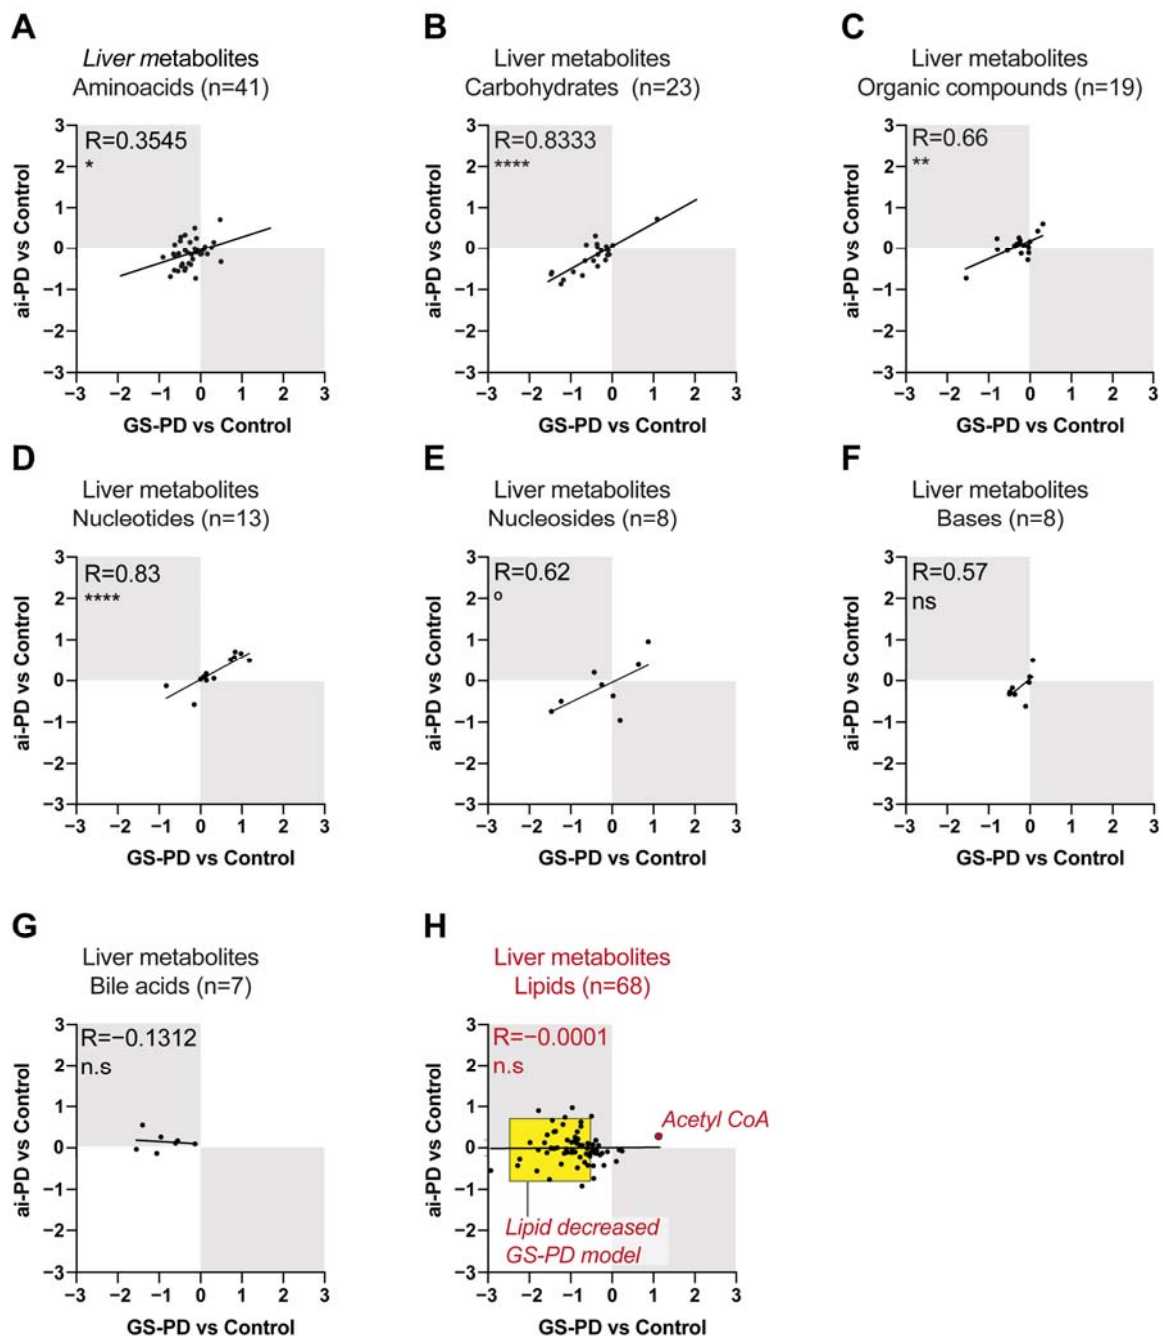

**Figure S2:** Correlation analysis between the changes observed in hepatic cells of the genetic model of PD (GS-PD) and acute intoxication (ai-PD) compared to healthy mice (Control). Metabolites were analyzed by divisions into metabolic routes: amino acids (A), carbohydrates (B), organic compounds (C), nucleotides (D), nucleosides (E), nitrogenous bases (F), bile acids (G) and lipids (H). Statistical analysis was performed by obtaining p values (n.s: non-significant; ° ( $p<0.1$ ), \* ( $p<0.05$ ), \*\* ( $p<0.01$ ), \*\*\*\* ( $p<0.0001$ )), and Pearson's correlation coefficients (R) between the observed changes.

| <br>Liver                                     | WT-LRRK2<br>(Untreated) | GS-PD<br>(Untreated) | ai-PD<br>(6-OHDA treated) |
|--------------------------------------------------------------------------------------------------------------------------------|-------------------------|----------------------|---------------------------|
|                                                                                                                                | Control                 | Genetic PD           | acute intoxicic. PD       |
| ATP and NADP                                                                                                                   | —                       | ↑                    | ↑                         |
| Acetyl CoA                                                                                                                     | —                       | ↑                    | —                         |
| Maltose/Ribose<br>Ribitol/Xilitol<br>Hypotaurine                                                                               | —                       | ↓                    | ↓                         |
| Saturated long chain-FA<br>Monounsatur. long chain-FA<br>Polyunsaturated-FA<br>Phosphatidylcholine<br>Phosphatidylethanolamine | —                       | ↓                    | —                         |

**Figure S3:** Summary with the models used and the main metabolic results obtained in this work. Green arrows indicate an increase and red arrows indicate a decrease in levels compared to the untreated control mice. 6-OHDA, 6-hydroxydopamine; ai, acute intoxication; ATP, adenosine triphosphate; FA, fatty acids; GS, *LRRK2* G2019S mutation; NADH, nicotinic amide adenine dinucleotide; NADP, Nicotinamide adenine dinucleotide phosphate; PD, Parkinson disease.

**Table S1:** Metabolite changes in striatum cells from control and PD mouse models (GS-PD or ai-PD). N: number of mice/groups detected for each metabolite; Average: Average log2area; SEM: standard error of the mean; Log2FC: Log2 fold change between two groups and statistical analysis was performed by obtaining *p* values (GS-PD vs control, first column Log2FC; ai-PD vs control second column Log2FC). PCae (phosphatidylcholine); PCee (phosphatidylethanolamine).

| Metabolites     | Name                  | Control   |           |           |           |           | N     | AVERAGE | SEM   | GS-PO   |         |         |         |         | N     | AVERAGE | SEM   | al-PO   |         |         |       |       | N     | AVERAGE | SEM   | sigFC vs Control |       | al-PO vs Control |  |
|-----------------|-----------------------|-----------|-----------|-----------|-----------|-----------|-------|---------|-------|---------|---------|---------|---------|---------|-------|---------|-------|---------|---------|---------|-------|-------|-------|---------|-------|------------------|-------|------------------|--|
|                 |                       | Control 1 | Control 2 | Control 3 | Control 4 | Control 5 |       |         |       | GS-PO 1 | GS-PO 2 | GS-PO 3 | GS-PO 4 | al-PO 1 |       |         |       | al-PO 2 | al-PO 3 | al-PO 4 | sigFC | sigFC |       |         |       | al-PO vs Control | TTEST |                  |  |
| Amino acids     | 3-methylcrotonic acid | 1.35      | 3.99      | 4.39      | 1.24      | 1.82      | 5     | 2.56    | 0.68  | 3.61    | 1.21    | 0.99    | 1.52    | 4       | 1.98  | 0.39    | 1.26  | 4.61    | 1.67    | 0.08    | 0.27  | 5     | 2.38  | 0.84    | 0.62  | 0.32             | 0.11  | 0.872            |  |
|                 | 4-guanidinobutyrate   | -0.62     | 4.42      | 0.39      | 0.39      | 0.17      | 5     | 1.73    | 0.56  | 0.36    | 0.08    | 0.88    | 1.16    | 3       | 1.36  | 1.16    | 0.75  | 0.29    | -1.84   | -2.46   | -1.09 | 5     | 1.67  | 1.56    | 0.37  | 0.861            | 0.05  | 0.881            |  |
|                 | 4-hydroxyproline      | -0.86     | -0.58     | -0.52     | -1.14     | -0.22     | 5     | -0.66   | 0.16  | -1.46   | -1.26   | -0.34   | 1.07    | 4       | -0.50 | 0.38    | -0.02 | 0.69    | -1.46   | -2.09   | -1.15 | 5     | 0.80  | 0.50    | 0.17  | 0.764            | 0.14  | 0.797            |  |
|                 | 5-aminomethyl acid    | 0.17      | -0.07     | -0.49     | 0.16      | 0.36      | 5     | -0.04   | 0.17  | -0.29   | -0.06   | 0.19    | 0.48    | 4       | -0.14 | 0.04    | 0.25  | 0.09    | 0.16    | 0.33    | 0.07  | 5     | 0.12  | 0.08    | 0.02  | 0.246            | 0.16  | 0.406            |  |
|                 | 5-isopropyl           | -0.55     | -0.63     | -0.58     | -0.57     | 0.04      | 5     | -0.46   | 0.13  | -0.95   | -0.65   | -0.22   | 0.35    | 4       | -0.54 | 0.16    | -0.40 | -0.16   | -0.76   | -0.74   | -0.38 | 5     | -0.49 | 0.11    | 0.09  | 0.676            | 0.03  | 0.862            |  |
|                 | Alanine               | -0.23     | -0.36     | -0.80     | -0.16     | 0.03      | 5     | -0.30   | 0.14  | -0.79   | -0.50   | -0.09   | 0.10    | 4       | -0.27 | 0.22    | -0.38 | -0.32   | -0.45   | -0.60   | -0.46 | 5     | 0.44  | 0.05    | 0.03  | 0.910            | 0.14  | 0.376            |  |
|                 | Arginine              | 1.96      | 3.97      | 4.43      | 1.47      | 1.06      | 5     | 3.12    | 0.65  | 3.12    | 1.43    | 0.23    | 0.96    | 4       | 1.37  | 0.66    | 1.51  | 3.94    | 3.32    | 4.25    | 0.19  | 5     | 2.44  | 0.76    | 0.38  | 0.329            | 0.19  | 0.429            |  |
|                 | Asparagine            | -0.05     | -0.13     | -0.27     | -0.23     | 0.59      | 5     | 0.00    | 0.16  | -0.07   | -1.06   | 0.17    | 0.45    | 4       | -0.38 | 0.40    | -0.26 | 0.06    | -0.68   | -0.80   | -1.01 | 5     | 0.54  | 0.19    | 0.38  | 0.366            | 0.54  | 0.060            |  |
|                 | Aspartic acid         | -0.62     | -0.60     | -0.84     | -0.44     | 0.46      | 5     | -0.41   | 0.23  | -0.96   | -0.32   | -0.09   | 0.80    | 4       | -0.14 | 0.37    | -0.28 | 0.34    | -0.62   | -1.19   | -1.10 | 5     | -0.39 | 0.24    | 0.27  | 0.538            | 0.02  | 0.959            |  |
|                 | Beta-alanine          | 1.10      | -0.01     | 0.13      | 0.11      | 0.09      | 5     | 0.23    | 0.22  | 0.08    | 0.30    | -0.81   | 0.06    | 4       | 0.15  | 0.62    | 0.36  | 1.00    | 1.47    | 0.21    | 5     | 0.12  | 0.08  | 0.02    | 0.167 | 0.28             | 0.489 |                  |  |
|                 | Betaine/Valine        | 2.34      | 2.86      | 4.00      | 2.16      | 2.59      | 5     | 2.79    | 0.33  | 2.85    | 1.25    | 1.73    | 2.41    | 4       | 2.06  | 0.35    | 2.06  | 3.68    | 2.00    | 2.64    | 0.11  | 5     | 2.10  | 0.58    | 0.73  | 0.175            | 0.69  | 0.327            |  |
|                 | Citrulline            | -0.07     | -0.11     | -0.39     | -0.44     | 0.01      | 5     | -0.28   | 0.10  | -1.04   | -0.76   | 0.05    | 0.46    | 4       | -0.29 | 0.20    | 0.13  | -0.09   | -0.55   | -0.40   | -0.30 | 5     | 0.38  | 0.18    | 0.02  | 0.796            | 0.10  | 0.644            |  |
|                 | Creatine              | 0.68      | -0.07     | -0.36     | -0.03     | 0.67      | 5     | 0.18    | 0.21  | -0.64   | 0.05    | 0.08    | 0.67    | 4       | 0.04  | 0.27    | 0.92  | 0.23    | 1.34    | 0.08    | 0.83  | 5     | 0.68  | 0.23    | 0.14  | 0.691            | 0.50  | 0.148            |  |
|                 | Creatinine            | 1.63      | 2.50      | 2.39      | 1.56      | 1.48      | 5     | 2.02    | 0.29  | 2.38    | 1.09    | 1.18    | 1.95    | 4       | 1.64  | 0.31    | 1.63  | 3.68    | 2.48    | 3.17    | 0.78  | 5     | 2.35  | 0.52    | 0.37  | 0.413            | 0.33  | 0.595            |  |
|                 | Cystine/Cystanone     | 0.66      | -0.57     | -0.68     | -0.57     | 0.08      | 5     | -0.04   | 0.33  | -1.64   | -0.87   | -0.34   | 0.47    | 4       | -0.67 | 0.39    | 0.19  | 0.07    | -0.54   | -0.10   | -0.15 | 5     | 0.05  | 0.22    | 0.02  | 0.253            | 0.09  | 0.822            |  |
|                 | Dimethylglycine       | 2.38      | 2.99      | 3.49      | 2.33      | 2.23      | 5     | 2.73    | 0.23  | 2.86    | 1.63    | 1.30    | 2.50    | 4       | 2.07  | 0.37    | 1.78  | 4.11    | 2.86    | 3.70    | 0.39  | 5     | 2.58  | 0.68    | 0.65  | 0.154            | 0.44  | 0.848            |  |
|                 | Dimethyllysine        | 2.20      | 2.90      | 3.72      | 2.38      | 1.76      | 5     | 2.59    | 0.34  | 3.15    | 1.77    | 2.20    | 2.20    | 4       | 2.23  | 0.36    | 1.82  | 4.15    | 1.63    | 3.48    | -0.04 | 5     | 2.11  | 0.76    | 0.36  | 0.488            | 0.49  | 0.574            |  |
|                 | GABA                  | 0.34      | -0.54     | -0.49     | -1.00     | -0.31     | 5     | -0.49   | 0.20  | -1.31   | -1.08   | -0.41   | 0.81    | 4       | -0.50 | 0.48    | 0.00  | 0.46    | -0.55   | -0.08   | -0.73 | 5     | 0.15  | 0.27    | 0.30  | 0.851            | 0.25  | 0.455            |  |
|                 | Glutamic acid         | -0.59     | -0.77     | 0.05      | -0.77     | 0.99      | 5     | -0.12   | 0.31  | -1.45   | -0.88   | -0.46   | 1.37    | 4       | -0.35 | 0.61    | -0.29 | 0.31    | -1.27   | -1.18   | -0.15 | 5     | -0.52 | 0.31    | 0.24  | 0.724            | 0.40  | 0.389            |  |
|                 | Glutamine             | -0.22     | 0.39      | 0.45      | -0.07     | 1.14      | 5     | 0.34    | 0.24  | 0.45    | -0.06   | 1.26    | 1.01    | 4       | 0.38  | 0.50    | 0.55  | 0.01    | 0.14    | 0.75    | 0.11  | 5     | 0.49  | 0.14    | 0.12  | 0.414            | 0.15  | 0.591            |  |
|                 | Glycine               | 0.59      | -0.25     | 0.25      | -0.36     | 0.06      | 5     | -0.04   | 0.17  | -0.22   | 0.33    | -0.40   | 0.23    | 4       | -0.30 | 0.04    | 0.25  | -0.09   | 0.16    | 0.33    | 0.07  | 5     | 0.12  | 0.08    | 0.02  | 0.246            | 0.16  | 0.406            |  |
|                 | Homocysteine          | 0.23      | 0.11      | -0.15     | -0.31     | 0.33      | 5     | 0.04    | 0.12  | -0.08   | -0.07   | 0.52    | 0.75    | 4       | 0.05  | 0.38    | 0.05  | 0.30    | -0.50   | -0.34   | -0.27 | 5     | 0.04  | 0.15    | 0.01  | 0.975            | 0.08  | 0.696            |  |
|                 | Isoleucine            | 0.10      | -0.60     | -0.89     | -0.84     | -0.32     | 5     | -0.53   | 0.15  | -1.30   | -0.93   | -0.46   | -0.51   | 4       | -0.42 | 0.36    | -0.10 | -1.30   | -0.09   | 0.12    | -0.07 | 5     | -0.49 | 0.29    | 0.11  | 0.767            | 0.04  | 0.904            |  |
|                 | Isoleucine            | -0.17     | -0.60     | -0.73     | -0.82     | -0.39     | 5     | -0.54   | 0.12  | -1.38   | -0.76   | -0.40   | 0.58    | 4       | -0.68 | 0.29    | 0.01  | -1.09   | -0.28   | -0.22   | -1.17 | 5     | -0.55 | 0.24    | 0.14  | 0.663            | 0.01  | 0.971            |  |
|                 | Lysine                | 0.03      | -0.20     | -0.20     | -0.13     | 0.27      | 5     | -0.16   | 0.34  | -0.30   | -1.59   | 0.35    | 0.84    | 4       | -0.67 | 0.44    | -0.06 | 0.07    | -0.24   | 0.13    | -0.83 | 5     | 0.19  | 0.17    | 0.08  | 0.848            | 0.07  | 0.888            |  |
|                 | Methionine            | 0.25      | -0.44     | -0.56     | -0.27     | 0.40      | 5     | -0.12   | 0.19  | -1.72   | -1.03   | -0.30   | 0.02    | 4       | -0.76 | 0.39    | -0.72 | -0.17   | -0.16   | -1.02   | -1.26 | 5     | -0.66 | 0.22    | 0.63  | 0.181            | 0.54  | 0.102            |  |
|                 | N-acetylglutamic acid | 2.63      | 4.01      | 0.34      | 0.74      | 2.89      | 5     | 2.56    | 0.36  | 4.71    | 1.85    | 2.35    | 3.24    | 4       | 1.04  | 0.63    | 3.23  | 6.05    | 2.69    | 4.41    | 0.81  | 5     | 3.27  | 0.94    | 0.48  | 0.598            | 0.71  | 0.534            |  |
|                 | N-acetylserine        | 1.13      | -0.01     | 0.07      | -0.15     | 0.76      | 5     | -0.05   | 0.27  | 0.08    | 1.32    | -0.36   | 0.44    | 4       | -0.34 | 0.29    | 0.17  | 0.28    | 0.37    | -0.31   | -0.22 | 5     | 0.13  | 0.15    | 0.02  | 0.289            | 0.18  | 0.491            |  |
|                 | N-acetyltyrosine      | 2.12      | 3.05      | 3.73      | 1.75      | 1.76      | 5     | 2.48    | 0.39  | 2.71    | 1.98    | 2.35    | 1.76    | 4       | 1.95  | 0.28    | 1.45  | 4.26    | 2.18    | 3.61    | 0.24  | 5     | 2.35  | 0.72    | 0.53  | 0.333            | 0.13  | 0.877            |  |
|                 | Ornithine             | 0.38      | -0.19     | -0.27     | -0.42     | 0.11      | 5     | -0.13   | 0.22  | -0.73   | -0.42   | -0.16   | 0.43    | 4       | -0.12 | 0.26    | -0.15 | -0.22   | -0.36   | -0.15   | -0.14 | 5     | -0.23 | 0.26    | 0.15  | 0.486            | 0.08  | 0.645            |  |
|                 | Paranthanic acid      | -0.98     | -0.44     | -0.11     | -0.43     | 0.39      | 5     | -0.31   | 0.22  | -0.89   | -1.16   | -0.32   | 1.09    | 4       | -0.32 | 0.50    | 0.21  | -0.25   | -0.69   | -1.13   | -0.43 | 5     | -0.44 | 0.22    | 0.00  | 0.994            | 0.15  | 0.633            |  |
|                 | Phenylalanine         | -0.12     | -0.43     | 0.71      | -0.43     | 0.35      | 5     | -0.27   | 0.18  | -1.08   | -1.07   | 0.02    | 0.31    | 4       | -0.46 | 0.36    | -0.60 | 0.01    | -0.52   | -0.78   | -0.79 | 5     | 0.54  | 0.15    | 0.19  | 0.686            | 0.27  | 0.281            |  |
|                 | Proline               | 0.71      | -0.86     | -1.32     | -0.85     | -0.49     | 5     | -0.44   | 0.18  | -1.58   | -0.86   | -0.21   | 0.61    | 4       | -0.84 | 0.14    | -0.56 | -1.44   | -0.46   | -0.54   | -0.54 | 5     | 0.46  | 0.15    | 0.19  | 0.686            | 0.27  | 0.281            |  |
|                 | Proline betaine       | 2.46      | 2.66      | 3.95      | 2.55      | 3.27      | 5     | 2.98    | 0.28  | 3.45    | 2.01    | 2.66    | 3.31    | 4       | 2.86  | 0.33    | 2.10  | 4.12    | 2.18    | 2.81    | 0.03  | 5     | 2.25  | 0.66    | 0.12  | 0.796            | 0.71  | 0.339            |  |
| Serine          | 0.14                  | -0.40     | -0.34     | -0.36     | 0.42      | 5         | -0.11 | 0.16    | -1.45 | -0.34   | -0.12   | 0.72    | 4       | -0.17   | 0.34  | -0.04   | -0.97 | -0.12   | -0.39   | -1.22   | 5     | -0.35 | 0.23  | 0.46    | 0.229 | 0.44             | 0.144 |                  |  |
| Threonine       | 0.04                  | -0.14     | -0.04     | -0.18     | 0.02      | 5         | -0.16 | 0.21    | -0.32 | -0.16   | -0.22   | 0.21    | 4       | -0.17   | 0.34  | -0.04   | -0.97 | -0.12   | -0.39   | -1.22   | 5     | -0.35 | 0.23  | 0.46    | 0.229 | 0.44             | 0.144 |                  |  |
| Trimethyllysine | 1.79                  | 4.12      | 4.47      | 1.39      | 2.09      | 5         | 2.77  | 0.63    | 4.03  | 1.48    | 1.18    | 1.81    | 4       | 2.12    | 0.65  | 1.49    | 4.49  | 3.23    | 4.53    | 0.20    | 5     | 2.61  | 0.85  | 0.60    | 0.503 | 0.16             | 0.882 |                  |  |
| Tryptophan      | 0.15                  | -0.15     | -0.17     | -0.17     | 0.09      | 5         | -0.15 | 0.22    | -0.39 | -0.46   | -0.30   | 0.46    | 4       | -0.15   | 0.22  | -0.39   | -0.46 | -0.30   | -0.46   | -0.30   | 5     | -0.15 | 0.22  | 0.31    | 0.179 | 0.18             | 0.779 |                  |  |
| Tyrosine        | 0.13                  | -0.17     | -0.47     | -0.26     | 0.24      | 5         | -0.11 | 0.13    | -0.88 | -1.11   | 0.06    | 0.46    | 4       | -0.39   | 0.38  | -0.43   | -0.09 | -0.31   | -0.50   | -1.07   | 5     | -0.48 | 0.16  | 0.28    | 0.465 | 0.37             | 0.113 |                  |  |
| Valine          | 0.09                  | -0.34     | -0.99     | -0.83     | 0.22      | 5         | -0.37 | 0.24    | -0.77 | -0.84   | -0.23   | 0.05    | 4       | -0.46   | 0.21  | -0.64   | -0.62 | -0.07   | -0.45   | -0.69   | 5     | -0.46 | 0.14  | 0.09    | 0.788 | 0.09             | 0.744 |                  |  |
| Bases           | Adenosine             | 0.06      | -0        |           |           |           |       |         |       |         |         |         |         |         |       |         |       |         |         |         |       |       |       |         |       |                  |       |                  |  |

---

**Table S2:** Metabolite changes in hepatic cells from control and PD mouse models (GS-PD or ai-PD). N: number of mice/groups detected for each metabolite; Average: Average log2area; SEM: standard error of the mean; Log2FC: Log2 fold change between two groups and statistical analysis was performed by obtaining *p* values (GS-PD vs control, first column Log2FC; ai-PD vs control second column Log2FC). PCae (phosphatidylcholine); PCee (phosphatidylethanolamine).
